# Supplementary material for: Mating pattern and pollen dispersal in an advanced generation seed orchard of Cunninghamia lanceolata (Lamb.) Hook
Source: Front Plant Sci. 2022 Oct 27;13:1042290. doi: 10.3389/fpls.2022.1042290 (PMC9646989; doi:10.3389/fpls.2022.1042290)
Supplement: Supplementary file 1 [file DataSheet_1.xlsx]

## Sheet: S
Synchronization index of florescence		P1	P2_2	P3	P4	P5	P6	P7	P8	P9	P10	P11	P12	P13	P14	P15	P16	P17	P18	P19	P2_1	P21	P22	P23	P24	P25	P26	P27_1	P27_2	P29	P30	P31	P32	P33	P34	P35	P36	P37	P38	P39	P40	P41	P42	P43	P44	P45	P46	P47	P48
		♂	♂	♂	♂	♂	♂	♂	♂	♂	♂	♂	♂	♂	♂	♂	♂	♂	♂	♂	♂	♂	♂	♂	♂	♂	♂	♂	♂	♂	♂	♂	♂	♂	♂	♂	♂	♂	♂	♂	♂	♂	♂	♂	♂	♂	♂	♂	♂
P1	♀	0.470588	0.529412	0.5	0.769231	0.916667	0.846154	1	0.642857	0.466667	0.733333	0.833333	0.375	0.533333	0.846154	1	0.352941	0.916667	0.833333	0.470588	0.642857	0.5	0.529412	0.733333	0.470588	0.470588	0.470588	0.8	0.785714	0.571429	0.733333	0.846154	0.916667	0.470588	0.666667	0.529412	0.692308	0.5	0.923077	0.733333	0.733333	0.714286	0.5	0.916667	0.533333	0.625	0.642857	0.785714	0.625
P2_2	♀	0.375	0.4375	0.4	0.666667	0.818182	0.75	0.75	0.538462	0.357143	0.642857	0.727273	0.266667	0.428571	0.75	0.75	0.25	0.818182	0.9	0.375	0.538462	0.384615	0.4375	0.642857	0.375	0.375	0.375	0.6	0.692308	0.461538	0.642857	0.75	0.818182	0.375	0.571429	0.4375	0.583333	0.4	0.692308	0.642857	0.642857	0.615385	0.4	0.818182	0.428571	0.533333	0.538462	0.692308	0.533333
P3	♀	0.529412	0.588235	0.5625	0.846154	0.846154	0.785714	0.923077	0.714286	0.533333	0.8	0.769231	0.4375	0.6	0.923077	0.923077	0.411765	0.846154	0.769231	0.529412	0.714286	0.571429	0.588235	0.8	0.529412	0.529412	0.529412	0.866667	0.857143	0.642857	0.8	0.923077	0.846154	0.529412	0.733333	0.588235	0.769231	0.5625	0.857143	0.8	0.8	0.785714	0.5625	0.846154	0.6	0.6875	0.714286	0.857143	0.6875
P4	♀	0.25	0.3	0.263158	0.4375	0.533333	0.714286	0.6	0.352941	0.222222	0.444444	0.466667	0.157895	0.277778	0.5	0.6	0.15	0.533333	0.571429	0.25	0.352941	0.235294	0.3	0.444444	0.25	0.25	0.25	0.5	0.470588	0.294118	0.444444	0.5	0.533333	0.25	0.388889	0.3	0.375	0.263158	0.666667	0.444444	0.444444	0.411765	0.263158	0.533333	0.277778	0.368421	0.352941	0.470588	0.368421
P5	♀	0.294118	0.352941	0.3125	0.538462	0.666667	0.75	0.75	0.428571	0.266667	0.533333	0.583333	0.1875	0.333333	0.615385	0.75	0.176471	0.666667	0.727273	0.294118	0.428571	0.285714	0.352941	0.533333	0.294118	0.294118	0.294118	0.6	0.571429	0.357143	0.533333	0.615385	0.666667	0.294118	0.466667	0.352941	0.461538	0.3125	0.692308	0.533333	0.533333	0.5	0.3125	0.666667	0.333333	0.4375	0.428571	0.571429	0.4375
P6	♀	0.2	0.25	0.210526	0.375	0.466667	0.642857	0.533333	0.294118	0.166667	0.388889	0.4	0.105263	0.222222	0.4375	0.533333	0.1	0.466667	0.5	0.2	0.294118	0.176471	0.25	0.388889	0.2	0.2	0.2	0.444444	0.411765	0.235294	0.388889	0.4375	0.466667	0.2	0.333333	0.25	0.3125	0.210526	0.6	0.388889	0.388889	0.352941	0.210526	0.466667	0.222222	0.315789	0.294118	0.411765	0.315789
P7	♀	0.333333	0.388889	0.352941	0.571429	0.692308	0.916667	0.769231	0.466667	0.3125	0.5625	0.615385	0.235294	0.375	0.642857	0.769231	0.222222	0.692308	0.75	0.333333	0.466667	0.333333	0.388889	0.5625	0.333333	0.333333	0.333333	0.625	0.6	0.4	0.5625	0.642857	0.692308	0.333333	0.5	0.388889	0.5	0.352941	0.846154	0.5625	0.5625	0.533333	0.352941	0.692308	0.375	0.470588	0.466667	0.6	0.470588
P8	♀	0.6875	0.75	0.733333	0.785714	0.785714	0.625	0.733333	0.785714	0.714286	1	0.714286	0.6	0.785714	0.857143	0.733333	0.5625	0.785714	0.714286	0.6875	0.785714	0.642857	0.75	1	0.6875	0.6875	0.6875	0.933333	0.928571	0.714286	1	0.857143	0.785714	0.6875	0.928571	0.75	0.714286	0.733333	0.6875	1	1	0.857143	0.733333	0.785714	0.785714	0.866667	0.785714	0.928571	0.866667
P9	♀	0	0	0	0	0	0	0	0	0	0	0	0	0	0	0	0	0	0	0	0	0	0	0	0	0	0	0	0	0	0	0	0	0	0	0	0	0	0	0	0	0	0	0	0	0	0	0	0
P10	♀	0.444444	0.5	0.470588	0.714286	0.846154	0.923077	0.923077	0.6	0.4375	0.6875	0.769231	0.352941	0.5	0.785714	0.923077	0.333333	0.846154	0.769231	0.444444	0.6	0.466667	0.5	0.6875	0.444444	0.444444	0.444444	0.75	0.733333	0.533333	0.6875	0.785714	0.846154	0.444444	0.625	0.5	0.642857	0.470588	1	0.6875	0.6875	0.666667	0.470588	0.846154	0.5	0.588235	0.6	0.733333	0.588235
P11	♀	0.4	0.45	0.421053	0.625	0.733333	0.8	0.8	0.529412	0.388889	0.611111	0.666667	0.315789	0.444444	0.6875	0.8	0.3	0.733333	0.666667	0.4	0.529412	0.411765	0.45	0.611111	0.4	0.4	0.4	0.666667	0.647059	0.470588	0.611111	0.6875	0.733333	0.4	0.555556	0.45	0.5625	0.421053	0.866667	0.611111	0.611111	0.588235	0.421053	0.733333	0.444444	0.526316	0.529412	0.647059	0.526316
P12	♀	0	0	0	0	0	0	0	0	0	0	0	0	0	0	0	0	0	0	0	0	0	0	0	0	0	0	0	0	0	0	0	0	0	0	0	0	0	0	0	0	0	0	0	0	0	0	0	0
P13	♀	0.411765	0.470588	0.4375	0.692308	0.833333	0.916667	0.916667	0.571429	0.4	0.666667	0.75	0.3125	0.466667	0.769231	0.916667	0.294118	0.833333	0.909091	0.411765	0.571429	0.428571	0.470588	0.666667	0.411765	0.411765	0.411765	0.733333	0.714286	0.5	0.666667	0.769231	0.833333	0.411765	0.6	0.470588	0.615385	0.4375	0.846154	0.666667	0.666667	0.642857	0.4375	0.833333	0.466667	0.5625	0.571429	0.714286	0.5625
P14	♀	0.25	0.3	0.263158	0.4375	0.533333	0.714286	0.6	0.352941	0.222222	0.444444	0.466667	0.157895	0.277778	0.5	0.6	0.15	0.533333	0.571429	0.25	0.352941	0.235294	0.3	0.444444	0.25	0.25	0.25	0.5	0.470588	0.294118	0.444444	0.5	0.533333	0.25	0.388889	0.3	0.375	0.263158	0.666667	0.444444	0.444444	0.411765	0.263158	0.533333	0.277778	0.368421	0.352941	0.470588	0.368421
P15	♀	0.277778	0.333333	0.294118	0.5	0.615385	0.833333	0.692308	0.4	0.25	0.5	0.538462	0.176471	0.3125	0.571429	0.692308	0.166667	0.615385	0.666667	0.277778	0.4	0.266667	0.333333	0.5	0.277778	0.277778	0.277778	0.5625	0.533333	0.333333	0.5	0.571429	0.615385	0.277778	0.4375	0.333333	0.428571	0.294118	0.769231	0.5	0.5	0.466667	0.294118	0.615385	0.3125	0.411765	0.4	0.533333	0.411765
P16	♀	0.470588	0.529412	0.5	0.769231	0.916667	0.846154	1	0.642857	0.466667	0.733333	0.833333	0.375	0.533333	0.846154	1	0.352941	0.916667	0.833333	0.470588	0.642857	0.5	0.529412	0.733333	0.470588	0.470588	0.470588	0.8	0.785714	0.571429	0.733333	0.846154	0.916667	0.470588	0.666667	0.529412	0.692308	0.5	0.923077	0.733333	0.733333	0.714286	0.5	0.916667	0.533333	0.625	0.642857	0.785714	0.625
P17	♀	0.444444	0.5	0.470588	0.714286	0.846154	0.923077	0.923077	0.6	0.4375	0.6875	0.769231	0.352941	0.5	0.785714	0.923077	0.333333	0.846154	0.769231	0.444444	0.6	0.466667	0.5	0.6875	0.444444	0.444444	0.444444	0.75	0.733333	0.533333	0.6875	0.785714	0.846154	0.444444	0.625	0.5	0.642857	0.470588	1	0.6875	0.6875	0.666667	0.470588	0.846154	0.5	0.588235	0.6	0.733333	0.588235
P18	♀	0.444444	0.5	0.470588	0.714286	0.846154	0.923077	0.923077	0.6	0.4375	0.6875	0.769231	0.352941	0.5	0.785714	0.923077	0.333333	0.846154	0.769231	0.444444	0.6	0.466667	0.5	0.6875	0.444444	0.444444	0.444444	0.75	0.733333	0.533333	0.6875	0.785714	0.846154	0.444444	0.625	0.5	0.642857	0.470588	1	0.6875	0.6875	0.666667	0.470588	0.846154	0.5	0.588235	0.6	0.733333	0.588235
P19	♀	0.846154	0.785714	0.916667	0.692308	0.571429	0.4375	0.533333	0.833333	0.909091	0.785714	0.615385	0.75	1	0.642857	0.533333	0.692308	0.571429	0.5	0.846154	0.833333	0.818182	0.785714	0.785714	0.846154	0.846154	0.846154	0.733333	0.714286	0.909091	0.785714	0.642857	0.571429	0.846154	0.846154	0.785714	0.75	0.916667	0.5	0.785714	0.785714	0.769231	0.916667	0.571429	1	0.785714	0.833333	0.714286	0.785714
P2_1	♀	0	0	0	0	0	0	0	0	0	0	0	0	0	0	0	0	0	0	0	0	0	0	0	0	0	0	0	0	0	0	0	0	0	0	0	0	0	0	0	0	0	0	0	0	0	0	0	0
P21	♀	0	0	0	0	0	0	0	0	0	0	0	0	0	0	0	0	0	0	0	0	0	0	0	0	0	0	0	0	0	0	0	0	0	0	0	0	0	0	0	0	0	0	0	0	0	0	0	0
P22	♀	0.411765	0.470588	0.4375	0.692308	0.833333	0.916667	0.916667	0.571429	0.4	0.666667	0.75	0.3125	0.466667	0.769231	0.916667	0.294118	0.833333	0.909091	0.411765	0.571429	0.428571	0.470588	0.666667	0.411765	0.411765	0.411765	0.733333	0.714286	0.5	0.666667	0.769231	0.833333	0.411765	0.6	0.470588	0.615385	0.4375	0.846154	0.666667	0.666667	0.642857	0.4375	0.833333	0.466667	0.5625	0.571429	0.714286	0.5625
P23	♀	0.333333	0.388889	0.352941	0.571429	0.692308	0.916667	0.769231	0.466667	0.3125	0.5625	0.615385	0.235294	0.375	0.642857	0.769231	0.222222	0.692308	0.75	0.333333	0.466667	0.333333	0.388889	0.5625	0.333333	0.333333	0.333333	0.625	0.6	0.4	0.5625	0.642857	0.692308	0.333333	0.5	0.388889	0.5	0.352941	0.846154	0.5625	0.5625	0.533333	0.352941	0.692308	0.375	0.470588	0.466667	0.6	0.470588
P24	♀	0.333333	0.388889	0.352941	0.571429	0.692308	0.916667	0.769231	0.466667	0.3125	0.5625	0.615385	0.235294	0.375	0.642857	0.769231	0.222222	0.692308	0.75	0.333333	0.466667	0.333333	0.388889	0.5625	0.333333	0.333333	0.333333	0.625	0.6	0.4	0.5625	0.642857	0.692308	0.333333	0.5	0.388889	0.5	0.352941	0.846154	0.5625	0.5625	0.533333	0.352941	0.692308	0.375	0.470588	0.466667	0.6	0.470588
P25	♀	0.5625	0.625	0.6	0.916667	0.916667	0.714286	0.846154	0.769231	0.571429	0.857143	0.833333	0.466667	0.642857	1	0.846154	0.4375	0.916667	0.833333	0.5625	0.769231	0.615385	0.625	0.857143	0.5625	0.5625	0.5625	0.8	0.923077	0.692308	0.857143	1	0.916667	0.5625	0.785714	0.625	0.833333	0.6	0.785714	0.857143	0.857143	0.846154	0.6	0.916667	0.642857	0.733333	0.769231	0.923077	0.733333
P26	♀	0.45	0.5	0.473684	0.6875	0.6875	0.75	0.75	0.588235	0.444444	0.666667	0.625	0.368421	0.5	0.75	0.75	0.35	0.6875	0.625	0.45	0.588235	0.470588	0.5	0.666667	0.45	0.45	0.45	0.722222	0.705882	0.529412	0.666667	0.75	0.6875	0.45	0.611111	0.5	0.625	0.473684	0.8125	0.666667	0.666667	0.647059	0.473684	0.6875	0.5	0.578947	0.588235	0.705882	0.578947
P27_1	♀	0.315789	0.368421	0.333333	0.533333	0.642857	0.846154	0.714286	0.4375	0.294118	0.529412	0.571429	0.222222	0.352941	0.6	0.714286	0.210526	0.642857	0.692308	0.315789	0.4375	0.3125	0.368421	0.529412	0.315789	0.315789	0.315789	0.588235	0.5625	0.375	0.529412	0.6	0.642857	0.315789	0.470588	0.368421	0.466667	0.333333	0.785714	0.529412	0.529412	0.5	0.333333	0.642857	0.352941	0.444444	0.4375	0.5625	0.444444
P27_2	♀	0.4	0.45	0.421053	0.625	0.733333	0.8	0.8	0.529412	0.388889	0.611111	0.666667	0.315789	0.444444	0.6875	0.8	0.3	0.733333	0.666667	0.4	0.529412	0.411765	0.45	0.611111	0.4	0.4	0.4	0.666667	0.647059	0.470588	0.611111	0.6875	0.733333	0.4	0.555556	0.45	0.5625	0.421053	0.866667	0.611111	0.611111	0.588235	0.421053	0.733333	0.444444	0.526316	0.529412	0.647059	0.526316
P29	♀	0.5625	0.625	0.6	0.916667	0.916667	0.714286	0.846154	0.769231	0.571429	0.857143	0.833333	0.466667	0.642857	1	0.846154	0.4375	0.916667	0.833333	0.5625	0.769231	0.615385	0.625	0.857143	0.5625	0.5625	0.5625	0.8	0.923077	0.692308	0.857143	1	0.916667	0.5625	0.785714	0.625	0.833333	0.6	0.785714	0.857143	0.857143	0.846154	0.6	0.916667	0.642857	0.733333	0.769231	0.923077	0.733333
P30	♀	0.375	0.4375	0.4	0.666667	0.818182	0.75	0.75	0.538462	0.357143	0.642857	0.727273	0.266667	0.428571	0.75	0.75	0.25	0.818182	0.9	0.375	0.538462	0.384615	0.4375	0.642857	0.375	0.375	0.375	0.6	0.692308	0.461538	0.642857	0.75	0.818182	0.375	0.571429	0.4375	0.583333	0.4	0.692308	0.642857	0.642857	0.615385	0.4	0.818182	0.428571	0.533333	0.538462	0.692308	0.533333
P31	♀	0.8	0.866667	0.857143	0.785714	0.666667	0.529412	0.625	0.785714	0.714286	0.866667	0.714286	0.714286	0.785714	0.733333	0.625	0.666667	0.666667	0.6	0.8	0.785714	0.642857	0.866667	0.866667	0.8	0.8	0.8	0.8125	0.8	0.714286	0.866667	0.733333	0.666667	0.8	0.928571	0.866667	0.714286	0.857143	0.588235	0.866667	0.866667	0.857143	0.857143	0.666667	0.785714	1	0.785714	0.8	1
P32	♀	0.277778	0.333333	0.294118	0.5	0.615385	0.833333	0.692308	0.4	0.25	0.5	0.538462	0.176471	0.3125	0.571429	0.692308	0.166667	0.615385	0.666667	0.277778	0.4	0.266667	0.333333	0.5	0.277778	0.277778	0.277778	0.5625	0.533333	0.333333	0.5	0.571429	0.615385	0.277778	0.4375	0.333333	0.428571	0.294118	0.769231	0.5	0.5	0.466667	0.294118	0.615385	0.3125	0.411765	0.4	0.533333	0.411765
P33	♀	0.470588	0.529412	0.5	0.769231	0.916667	0.846154	1	0.642857	0.466667	0.733333	0.833333	0.375	0.533333	0.846154	1	0.352941	0.916667	0.833333	0.470588	0.642857	0.5	0.529412	0.733333	0.470588	0.470588	0.470588	0.8	0.785714	0.571429	0.733333	0.846154	0.916667	0.470588	0.666667	0.529412	0.692308	0.5	0.923077	0.733333	0.733333	0.714286	0.5	0.916667	0.533333	0.625	0.642857	0.785714	0.625
P34	♀	0.352941	0.411765	0.375	0.615385	0.75	0.833333	0.833333	0.5	0.333333	0.6	0.666667	0.25	0.4	0.692308	0.833333	0.235294	0.75	0.818182	0.352941	0.5	0.357143	0.411765	0.6	0.352941	0.352941	0.352941	0.666667	0.642857	0.428571	0.6	0.692308	0.75	0.352941	0.533333	0.411765	0.538462	0.375	0.769231	0.6	0.6	0.571429	0.375	0.75	0.4	0.5	0.5	0.642857	0.5
P35	♀	0.3	0.35	0.315789	0.5	0.6	0.785714	0.666667	0.411765	0.277778	0.5	0.533333	0.210526	0.333333	0.5625	0.666667	0.2	0.6	0.642857	0.3	0.411765	0.294118	0.35	0.5	0.3	0.3	0.3	0.555556	0.529412	0.352941	0.5	0.5625	0.6	0.3	0.444444	0.35	0.4375	0.315789	0.733333	0.5	0.5	0.470588	0.315789	0.6	0.333333	0.421053	0.411765	0.529412	0.421053
P36	♀	0.277778	0.333333	0.294118	0.5	0.615385	0.833333	0.692308	0.4	0.25	0.5	0.538462	0.176471	0.3125	0.571429	0.692308	0.166667	0.615385	0.666667	0.277778	0.4	0.266667	0.333333	0.5	0.277778	0.277778	0.277778	0.5625	0.533333	0.333333	0.5	0.571429	0.615385	0.277778	0.4375	0.333333	0.428571	0.294118	0.769231	0.5	0.5	0.466667	0.294118	0.615385	0.3125	0.411765	0.4	0.533333	0.411765
P37	♀	0.388889	0.444444	0.411765	0.642857	0.769231	1	0.846154	0.533333	0.375	0.625	0.692308	0.294118	0.4375	0.714286	0.846154	0.277778	0.769231	0.833333	0.388889	0.533333	0.4	0.444444	0.625	0.388889	0.388889	0.388889	0.6875	0.666667	0.466667	0.625	0.714286	0.769231	0.388889	0.5625	0.444444	0.571429	0.411765	0.923077	0.625	0.625	0.6	0.411765	0.769231	0.4375	0.529412	0.533333	0.666667	0.529412
P38	♀	0.263158	0.315789	0.277778	0.466667	0.571429	0.769231	0.642857	0.375	0.235294	0.470588	0.5	0.166667	0.294118	0.533333	0.642857	0.157895	0.571429	0.615385	0.263158	0.375	0.25	0.315789	0.470588	0.263158	0.263158	0.263158	0.529412	0.5	0.3125	0.470588	0.533333	0.571429	0.263158	0.411765	0.315789	0.4	0.277778	0.714286	0.470588	0.470588	0.4375	0.277778	0.571429	0.294118	0.388889	0.375	0.5	0.388889
P39	♀	0.333333	0.388889	0.352941	0.571429	0.692308	0.916667	0.769231	0.466667	0.3125	0.5625	0.615385	0.235294	0.375	0.642857	0.769231	0.222222	0.692308	0.75	0.333333	0.466667	0.333333	0.388889	0.5625	0.333333	0.333333	0.333333	0.625	0.6	0.4	0.5625	0.642857	0.692308	0.333333	0.5	0.388889	0.5	0.352941	0.846154	0.5625	0.5625	0.533333	0.352941	0.692308	0.375	0.470588	0.466667	0.6	0.470588
P40	♀	0.388889	0.444444	0.411765	0.642857	0.769231	1	0.846154	0.533333	0.375	0.625	0.692308	0.294118	0.4375	0.714286	0.846154	0.277778	0.769231	0.833333	0.388889	0.533333	0.4	0.444444	0.625	0.388889	0.388889	0.388889	0.6875	0.666667	0.466667	0.625	0.714286	0.769231	0.388889	0.5625	0.444444	0.571429	0.411765	0.923077	0.625	0.625	0.6	0.411765	0.769231	0.4375	0.529412	0.533333	0.666667	0.529412
P41	♀	0.333333	0.388889	0.352941	0.571429	0.692308	0.916667	0.769231	0.466667	0.3125	0.5625	0.615385	0.235294	0.375	0.642857	0.769231	0.222222	0.692308	0.75	0.333333	0.466667	0.333333	0.388889	0.5625	0.333333	0.333333	0.333333	0.625	0.6	0.4	0.5625	0.642857	0.692308	0.333333	0.5	0.388889	0.5	0.352941	0.846154	0.5625	0.5625	0.533333	0.352941	0.692308	0.375	0.470588	0.466667	0.6	0.470588
P42	♀	0	0	0	0	0	0	0	0	0	0	0	0	0	0	0	0	0	0	0	0	0	0	0	0	0	0	0	0	0	0	0	0	0	0	0	0	0	0	0	0	0	0	0	0	0	0	0	0
P43	♀	0.352941	0.411765	0.375	0.615385	0.75	0.833333	0.833333	0.5	0.333333	0.6	0.666667	0.25	0.4	0.692308	0.833333	0.235294	0.75	0.818182	0.352941	0.5	0.357143	0.411765	0.6	0.352941	0.352941	0.352941	0.666667	0.642857	0.428571	0.6	0.692308	0.75	0.352941	0.533333	0.411765	0.538462	0.375	0.769231	0.6	0.6	0.571429	0.375	0.75	0.4	0.5	0.5	0.642857	0.5
P44	♀	0.315789	0.368421	0.333333	0.533333	0.642857	0.846154	0.714286	0.4375	0.294118	0.529412	0.571429	0.222222	0.352941	0.6	0.714286	0.210526	0.642857	0.692308	0.315789	0.4375	0.3125	0.368421	0.529412	0.315789	0.315789	0.315789	0.588235	0.5625	0.375	0.529412	0.6	0.642857	0.315789	0.470588	0.368421	0.466667	0.333333	0.785714	0.529412	0.529412	0.5	0.333333	0.642857	0.352941	0.444444	0.4375	0.5625	0.444444
P45	♀	0.368421	0.421053	0.388889	0.6	0.714286	0.923077	0.785714	0.5	0.352941	0.588235	0.642857	0.277778	0.411765	0.666667	0.785714	0.263158	0.714286	0.769231	0.368421	0.5	0.375	0.421053	0.588235	0.368421	0.368421	0.368421	0.647059	0.625	0.4375	0.588235	0.666667	0.714286	0.368421	0.529412	0.421053	0.533333	0.388889	0.857143	0.588235	0.588235	0.5625	0.388889	0.714286	0.411765	0.5	0.5	0.625	0.5
P46	♀	0	0	0	0	0	0	0	0	0	0	0	0	0	0	0	0	0	0	0	0	0	0	0	0	0	0	0	0	0	0	0	0	0	0	0	0	0	0	0	0	0	0	0	0	0	0	0	0
P47	♀	0.263158	0.315789	0.277778	0.466667	0.571429	0.769231	0.642857	0.375	0.235294	0.470588	0.5	0.166667	0.294118	0.533333	0.642857	0.157895	0.571429	0.615385	0.263158	0.375	0.25	0.315789	0.470588	0.263158	0.263158	0.263158	0.529412	0.5	0.3125	0.470588	0.533333	0.571429	0.263158	0.411765	0.315789	0.4	0.277778	0.714286	0.470588	0.470588	0.4375	0.277778	0.571429	0.294118	0.388889	0.375	0.5	0.388889
P48	♀	0.555556	0.611111	0.588235	0.733333	0.733333	0.8	0.8	0.733333	0.5625	0.8125	0.666667	0.470588	0.625	0.8	0.8	0.444444	0.733333	0.666667	0.555556	0.733333	0.6	0.611111	0.8125	0.555556	0.555556	0.555556	0.875	0.866667	0.666667	0.8125	0.8	0.733333	0.555556	0.75	0.611111	0.666667	0.588235	0.866667	0.8125	0.8125	0.8	0.588235	0.733333	0.625	0.705882	0.733333	0.866667	0.705882
P49	♀	0.6	0.666667	0.642857	1	0.833333	0.642857	0.769231	0.833333	0.615385	0.785714	0.909091	0.5	0.692308	0.916667	0.769231	0.466667	0.833333	0.75	0.6	0.833333	0.666667	0.666667	0.785714	0.6	0.6	0.6	0.733333	0.846154	0.75	0.785714	0.916667	0.833333	0.6	0.846154	0.666667	0.909091	0.642857	0.714286	0.785714	0.785714	0.916667	0.642857	0.833333	0.692308	0.785714	0.833333	0.846154	0.785714
P50	♀	0.35	0.4	0.368421	0.5625	0.666667	0.857143	0.733333	0.470588	0.333333	0.555556	0.6	0.263158	0.388889	0.625	0.733333	0.25	0.666667	0.714286	0.35	0.470588	0.352941	0.4	0.555556	0.35	0.35	0.35	0.611111	0.588235	0.411765	0.555556	0.625	0.666667	0.35	0.5	0.4	0.5	0.368421	0.8	0.555556	0.555556	0.529412	0.368421	0.666667	0.388889	0.473684	0.470588	0.588235	0.473684
P51	♀	0.368421	0.421053	0.388889	0.6	0.714286	0.923077	0.785714	0.5	0.352941	0.588235	0.642857	0.277778	0.411765	0.666667	0.785714	0.263158	0.714286	0.769231	0.368421	0.5	0.375	0.421053	0.588235	0.368421	0.368421	0.368421	0.647059	0.625	0.4375	0.588235	0.666667	0.714286	0.368421	0.529412	0.421053	0.533333	0.388889	0.857143	0.588235	0.588235	0.5625	0.388889	0.714286	0.411765	0.5	0.5	0.625	0.5
P52	♀	0.368421	0.421053	0.388889	0.6	0.714286	0.923077	0.785714	0.5	0.352941	0.588235	0.642857	0.277778	0.411765	0.666667	0.785714	0.263158	0.714286	0.769231	0.368421	0.5	0.375	0.421053	0.588235	0.368421	0.368421	0.368421	0.647059	0.625	0.4375	0.588235	0.666667	0.714286	0.368421	0.529412	0.421053	0.533333	0.388889	0.857143	0.588235	0.588235	0.5625	0.388889	0.714286	0.411765	0.5	0.5	0.625	0.5
P53	♀	0.263158	0.315789	0.277778	0.466667	0.571429	0.769231	0.642857	0.375	0.235294	0.470588	0.5	0.166667	0.294118	0.533333	0.642857	0.157895	0.571429	0.615385	0.263158	0.375	0.25	0.315789	0.470588	0.263158	0.263158	0.263158	0.529412	0.5	0.3125	0.470588	0.533333	0.571429	0.263158	0.411765	0.315789	0.4	0.277778	0.714286	0.470588	0.470588	0.4375	0.277778	0.571429	0.294118	0.388889	0.375	0.5	0.388889
P54	♀	0.3	0.35	0.315789	0.5	0.6	0.785714	0.666667	0.411765	0.277778	0.5	0.533333	0.210526	0.333333	0.5625	0.666667	0.2	0.6	0.642857	0.3	0.411765	0.294118	0.35	0.5	0.3	0.3	0.3	0.555556	0.529412	0.352941	0.5	0.5625	0.6	0.3	0.444444	0.35	0.4375	0.315789	0.733333	0.5	0.5	0.470588	0.315789	0.6	0.333333	0.421053	0.411765	0.529412	0.421053
P55	♀	0	0	0	0	0	0	0	0	0	0	0	0	0	0	0	0	0	0	0	0	0	0	0	0	0	0	0	0	0	0	0	0	0	0	0	0	0	0	0	0	0	0	0	0	0	0	0	0
P56	♀	0	0	0	0	0	0	0	0	0	0	0	0	0	0	0	0	0	0	0	0	0	0	0	0	0	0	0	0	0	0	0	0	0	0	0	0	0	0	0	0	0	0	0	0	0	0	0	0
P57	♀	0	0	0	0	0	0	0	0	0	0	0	0	0	0	0	0	0	0	0	0	0	0	0	0	0	0	0	0	0	0	0	0	0	0	0	0	0	0	0	0	0	0	0	0	0	0	0	0
P58	♀	0.277778	0.333333	0.294118	0.5	0.615385	0.833333	0.692308	0.4	0.25	0.5	0.538462	0.176471	0.3125	0.571429	0.692308	0.166667	0.615385	0.666667	0.277778	0.4	0.266667	0.333333	0.5	0.277778	0.277778	0.277778	0.5625	0.533333	0.333333	0.5	0.571429	0.615385	0.277778	0.4375	0.333333	0.428571	0.294118	0.769231	0.5	0.5	0.466667	0.294118	0.615385	0.3125	0.411765	0.4	0.533333	0.411765
P59	♀	0.388889	0.444444	0.411765	0.642857	0.769231	1	0.846154	0.533333	0.375	0.625	0.692308	0.294118	0.4375	0.714286	0.846154	0.277778	0.769231	0.833333	0.388889	0.533333	0.4	0.444444	0.625	0.388889	0.388889	0.388889	0.6875	0.666667	0.466667	0.625	0.714286	0.769231	0.388889	0.5625	0.444444	0.571429	0.411765	0.923077	0.625	0.625	0.6	0.411765	0.769231	0.4375	0.529412	0.533333	0.666667	0.529412
P60	♀	0.846154	0.785714	0.916667	0.692308	0.571429	0.4375	0.533333	0.833333	0.909091	0.785714	0.615385	0.75	1	0.642857	0.533333	0.692308	0.571429	0.5	0.846154	0.833333	0.818182	0.785714	0.785714	0.846154	0.846154	0.846154	0.733333	0.714286	0.909091	0.785714	0.642857	0.571429	0.846154	0.846154	0.785714	0.75	0.916667	0.5	0.785714	0.785714	0.769231	0.916667	0.571429	1	0.785714	0.833333	0.714286	0.785714
P61	♀	0.526316	0.578947	0.555556	0.6875	0.6875	0.75	0.75	0.6875	0.529412	0.764706	0.625	0.444444	0.588235	0.75	0.75	0.421053	0.6875	0.625	0.526316	0.6875	0.5625	0.578947	0.764706	0.526316	0.526316	0.526316	0.823529	0.8125	0.625	0.764706	0.75	0.6875	0.526316	0.705882	0.578947	0.625	0.555556	0.8125	0.764706	0.764706	0.75	0.555556	0.6875	0.588235	0.666667	0.6875	0.8125	0.666667
P62	♀	0.333333	0.380952	0.35	0.529412	0.625	0.8	0.6875	0.444444	0.315789	0.526316	0.5625	0.25	0.368421	0.588235	0.6875	0.238095	0.625	0.666667	0.333333	0.444444	0.333333	0.380952	0.526316	0.333333	0.333333	0.333333	0.578947	0.555556	0.388889	0.526316	0.588235	0.625	0.333333	0.473684	0.380952	0.470588	0.35	0.75	0.526316	0.526316	0.5	0.35	0.625	0.368421	0.45	0.444444	0.555556	0.45
P63	♀	0.2	0.25	0.210526	0.375	0.466667	0.642857	0.533333	0.294118	0.166667	0.388889	0.4	0.105263	0.222222	0.4375	0.533333	0.1	0.466667	0.5	0.2	0.294118	0.176471	0.25	0.388889	0.2	0.2	0.2	0.444444	0.411765	0.235294	0.388889	0.4375	0.466667	0.2	0.333333	0.25	0.3125	0.210526	0.6	0.388889	0.388889	0.352941	0.210526	0.466667	0.222222	0.315789	0.294118	0.411765	0.315789
P65	♀	0.444444	0.5	0.470588	0.714286	0.846154	0.923077	0.923077	0.6	0.4375	0.6875	0.769231	0.352941	0.5	0.785714	0.923077	0.333333	0.846154	0.769231	0.444444	0.6	0.466667	0.5	0.6875	0.444444	0.444444	0.444444	0.75	0.733333	0.533333	0.6875	0.785714	0.846154	0.444444	0.625	0.5	0.642857	0.470588	1	0.6875	0.6875	0.666667	0.470588	0.846154	0.5	0.588235	0.6	0.733333	0.588235
P66	♀	0.263158	0.315789	0.277778	0.466667	0.571429	0.769231	0.642857	0.375	0.235294	0.470588	0.5	0.166667	0.294118	0.533333	0.642857	0.157895	0.571429	0.615385	0.263158	0.375	0.25	0.315789	0.470588	0.263158	0.263158	0.263158	0.529412	0.5	0.3125	0.470588	0.533333	0.571429	0.263158	0.411765	0.315789	0.4	0.277778	0.714286	0.470588	0.470588	0.4375	0.277778	0.571429	0.294118	0.388889	0.375	0.5	0.388889
P67	♀	0.611111	0.666667	0.647059	0.6875	0.6875	0.75	0.75	0.6875	0.625	0.875	0.625	0.529412	0.6875	0.75	0.75	0.5	0.6875	0.625	0.611111	0.6875	0.5625	0.666667	0.875	0.611111	0.611111	0.611111	0.9375	0.8125	0.625	0.875	0.75	0.6875	0.611111	0.8125	0.666667	0.625	0.647059	0.8125	0.875	0.875	0.75	0.647059	0.6875	0.6875	0.764706	0.6875	0.8125	0.764706
P68	♀	0.388889	0.444444	0.411765	0.642857	0.769231	1	0.846154	0.533333	0.375	0.625	0.692308	0.294118	0.4375	0.714286	0.846154	0.277778	0.769231	0.833333	0.388889	0.533333	0.4	0.444444	0.625	0.388889	0.388889	0.388889	0.6875	0.666667	0.466667	0.625	0.714286	0.769231	0.388889	0.5625	0.444444	0.571429	0.411765	0.923077	0.625	0.625	0.6	0.411765	0.769231	0.4375	0.529412	0.533333	0.666667	0.529412
P69	♀	0.388889	0.444444	0.411765	0.642857	0.769231	1	0.846154	0.533333	0.375	0.625	0.692308	0.294118	0.4375	0.714286	0.846154	0.277778	0.769231	0.833333	0.388889	0.533333	0.4	0.444444	0.625	0.388889	0.388889	0.388889	0.6875	0.666667	0.466667	0.625	0.714286	0.769231	0.388889	0.5625	0.444444	0.571429	0.411765	0.923077	0.625	0.625	0.6	0.411765	0.769231	0.4375	0.529412	0.533333	0.666667	0.529412
P70	♀	0.25	0.3	0.263158	0.4375	0.533333	0.714286	0.6	0.352941	0.222222	0.444444	0.466667	0.157895	0.277778	0.5	0.6	0.15	0.533333	0.571429	0.25	0.352941	0.235294	0.3	0.444444	0.25	0.25	0.25	0.5	0.470588	0.294118	0.444444	0.5	0.533333	0.25	0.388889	0.3	0.375	0.263158	0.666667	0.444444	0.444444	0.411765	0.263158	0.533333	0.277778	0.368421	0.352941	0.470588	0.368421
[truncated: 21 more columns]
